# Supplementary material for: Agl24 is an ancient archaeal homolog of the eukaryotic N-glycan chitobiose synthesis enzymes
Source: eLife journal article supplement (doi:10.7554/elife.67448), 2022-03-14
Supplement: supp1 [file elife-67448-supp1-v1.pdf]

| Description                                                                                                                             | Max score                                                           | Total score | Query cover | E value | Per. Ident | Accession                  | Saci gene        | KO                    | Annotation                                             |
|-----------------------------------------------------------------------------------------------------------------------------------------|---------------------------------------------------------------------|-------------|-------------|---------|------------|----------------------------|------------------|-----------------------|--------------------------------------------------------|
| <b>MurG</b> WP_063074721.1 undecaprenyldiphospho-muramoylpentapeptide beta-N-acetylglucosaminyltransferase [ <i>Escherichia coli</i> ]  |                                                                     |             |             |         |            |                            |                  |                       |                                                        |
| <a href="#">conserved Archaeal protein [Sulfolobus acidocaldarius DSM 639]</a>                                                          | 77.0                                                                | 77.0        | 76%         | 6e-17   | 14.52%     | <a href="#">AAy81210.1</a> | <i>saci_1907</i> | MW061<br>BM-A045-B027 | RfAB GT1_YqgM_like                                     |
| <a href="#">conserved protein [Sulfolobus acidocaldarius DSM 639]</a>                                                                   | 71.2                                                                | 71.2        | 98%         | 5e-15   | 16.76%     | <a href="#">AAy80607.1</a> | <i>saci_1262</i> | <i>essential</i>      | MurG                                                   |
| <a href="#">hypothetical protein Saci_1921 [Sulfolobus acidocaldarius DSM 639]</a>                                                      | 71.2                                                                | 71.2        | 72%         | 6e-15   | 13.33%     | <a href="#">AAy81224.1</a> | <i>saci_1921</i> | MW069<br>BM-A055-B003 | RfAB                                                   |
| <a href="#">RecName: Full=Archaeal glycosylation protein 16 [Sulfolobus acidocaldarius DSM 639]</a>                                     | 65.9                                                                | 65.9        | 75%         | 3e-13   | 9.90%      | <a href="#">Q4JAK2.1</a>   | <i>saci_0807</i> | MW043<br>BM-A110-B008 | Archaeal glycosylation protein 16                      |
| <a href="#">partially conserved Archaeal protein [Sulfolobus acidocaldarius DSM 639]</a>                                                | 61.2                                                                | 61.2        | 96%         | 1e-11   | 12.76%     | <a href="#">AAy81207.1</a> | <i>saci_1904</i> | MW077<br>BM-A050-B002 | Cell wall/membrane/envelope biogenesis                 |
| <a href="#">glycosyl transferase [Sulfolobus acidocaldarius DSM 639]</a>                                                                | 59.7                                                                | 98.2        | 74%         | 5e-11   | 14.02%     | <a href="#">AAy80548.1</a> | <i>saci_1201</i> | MW053<br>BM-A150-B1   | Glycogen synthase                                      |
| <a href="#">glycosyl transferase group 1 [Sulfolobus acidocaldarius DSM 639]</a>                                                        | 47.8                                                                | 47.8        | 77%         | 3e-07   | 12.38%     | <a href="#">AAy81133.1</a> | <i>saci_1827</i> | MW042<br>BM-A280-B001 | GT1_Trehalose_phosphorylase                            |
| <a href="#">glycosyl transferase group 1 protein [Sulfolobus acidocaldarius DSM 639]</a>                                                | 45.8                                                                | 45.8        | 49%         | 1e-06   | 16.59%     | <a href="#">AAy80595.1</a> | <i>saci_1249</i> | MW054<br>BM-A155-B001 | GT1_YqgM_like                                          |
| <a href="#">conserved protein [Sulfolobus acidocaldarius DSM 639]</a>                                                                   | 42.4                                                                | 42.4        | 34%         | 1e-05   | 18.11%     | <a href="#">AAy80235.1</a> | <i>saci_0869</i> | <i>essential</i>      | Glycosyltransferase involved in cell wall biosynthesis |
| <a href="#">conserved protein [Sulfolobus acidocaldarius DSM 639]</a>                                                                   | 42.4                                                                | 42.4        | 58%         | 2e-05   | 9.91%      | <a href="#">AAy81219.1</a> | <i>saci_1916</i> | MW066<br>BM-A024-B001 |                                                        |
| <a href="#">RecName: Full=UDP-sulfoquinovose synthase [Sulfolobus acidocaldarius DSM 639]</a>                                           | 40.4                                                                | 40.4        | 26%         | 7e-05   | 19.39%     | <a href="#">Q4JBj3.1</a>   | <i>saci_0423</i> | MW039<br>BM-A083-B008 | Agl3<br>UDP-sulfoquinovose synthase                    |
| <a href="#">hypothetical protein Saci_1923 [Sulfolobus acidocaldarius DSM 639]</a>                                                      | 39.3                                                                | 39.3        | 34%         | 1e-04   | 11.72%     | <a href="#">AAy81226.1</a> | <i>saci_1923</i> | n.d.                  |                                                        |
| <a href="#">conserved protein [Sulfolobus acidocaldarius DSM 639]</a>                                                                   | 38.5                                                                | 38.5        | 78%         | 3e-04   | 11.85%     | <a href="#">AAy81225.1</a> | <i>saci_1922</i> | MW070<br>BM-A060-B002 |                                                        |
| <b>ALG13</b> NP_011468.1 N-acetylglucosaminyldiphosphodolichol N-acetylglucosaminyltransferase [ <i>Saccharomyces cerevisiae</i> S288C] |                                                                     |             |             |         |            |                            |                  |                       |                                                        |
| <a href="#">conserved protein [Sulfolobus acidocaldarius DSM 639]</a>                                                                   | 43.9                                                                | 43.9        | 58%         | 1e-06   | 17.36%     | <a href="#">AAy80607.1</a> | <i>saci_1262</i> |                       | MurG                                                   |
| <b>ALG14</b> NP_009626.1 N-acetylglucosaminyldiphosphodolichol N-acetylglucosaminyltransferase [ <i>Saccharomyces cerevisiae</i> S288C] |                                                                     |             |             |         |            |                            |                  |                       |                                                        |
|                                                                                                                                         | No homolog above the standard Delta-Blast e-value threshold of 0.05 |             |             |         |            |                            |                  |                       |                                                        |
| <b>Alg14-13 fusion</b> (NP_009626.1+ NP_011468.1)                                                                                       |                                                                     |             |             |         |            |                            |                  |                       |                                                        |
| <a href="#">conserved protein [Sulfolobus acidocaldarius DSM 639]</a>                                                                   | 59.7                                                                | 59.7        | 73%         | 4e-11   | 16.92%     | <a href="#">AAy80607.1</a> | <i>saci_1262</i> |                       |                                                        |
