# Supplementary material for: Agl24 is an ancient archaeal homolog of the eukaryotic N-glycan chitobiose synthesis enzymes
Source: eLife journal article supplement (doi:10.7554/elife.67448), 2022-03-14
Supplement: supp2 [file elife-67448-supp2-v1.pdf]

| PDB                                 | RMSD  | GMQE | QSQE | Identity | X-ray | Reference            |
|-------------------------------------|-------|------|------|----------|-------|----------------------|
| Full Agl24 sequence                 |       |      |      |          |       |                      |
| 3s2U MurG                           | 13.82 | 0.51 | -    | 17.2     | 2.2Å  | (Brown et al., 2013) |
| 1f0k MurG                           | 15.94 | 0.55 | 0,31 | 17.36    | 1.9Å  | (Ha et al., 2000)    |
| 1nlm MurG                           | 16.22 | 0.55 | 0,20 | 17.36    | 2.5Å  | (Hu et al., 2003)    |
| Alphafold model                     | 3.80  | -    | -    | -        | -     | Supplement Data      |
| c-terminal Agl13-like part of Agl24 |       |      |      |          |       |                      |
| 2ks6 Alg13                          | -     | 0.56 | -    | 20.53    | NMR   | (Raman et al., 2010) |
| 2jzc Alg13                          | -     | 0.56 | -    | 19.87    | NMR   | (Wang et al., 2008)  |
| 1f0k MurG                           | -     | 0.46 | 0.17 | 19.70    | 1.9Å  | (Ha et al., 2000)    |
| 1nlm MurG                           | -     | 0.46 | -    | 19.70    | 2.5Å  | (Hu et al., 2003)    |
