# Supplementary material for: Agl24 is an ancient archaeal homolog of the eukaryotic N-glycan chitobiose synthesis enzymes
Source: eLife journal article supplement (doi:10.7554/elife.67448), 2022-03-14
Supplement: supp3 [file elife-67448-supp3-v1.pdf]

| Strains                                                 | Genotype                                                                                                                                                                                                                                                      | Reference                   |
|---------------------------------------------------------|---------------------------------------------------------------------------------------------------------------------------------------------------------------------------------------------------------------------------------------------------------------|-----------------------------|
| <b><i>E. coli</i></b>                                   |                                                                                                                                                                                                                                                               |                             |
| DH5 $\alpha$                                            | F <sup>-</sup> $\phi$ 80lacZ $\Delta$ M15 $\Delta$ (lacZYA-argF)U169 recA1 endA1 hsdR17(rK <sup>-</sup> , mK <sup>+</sup> ) phoA supE44 $\lambda$ - thi-1 gyrA96 relA1                                                                                        | (Taylor et al., 1993)       |
| BL21 (DE3)                                              | F <sup>-</sup> <i>ompT hsdS<sub>B</sub></i> (r <sub>B</sub> <sup>-</sup> , m <sub>B</sub> <sup>-</sup> ) <i>gal dcm</i> (DE3)                                                                                                                                 | (Studier and Moffatt, 1986) |
| ER1821                                                  | F <sup>-</sup> <i>glnV44 e14</i> -(McrA-) <i>rfbD1?</i> <i>relA1?</i> <i>endA1 spoT1?</i> <i>thi-1</i> $\Delta$ ( <i>mcrC-mrr</i> )114::IS10, MM294 background                                                                                                | (Meselson and Yuan, 1968)   |
| <b><i>Sulfolobus acidocaldarius</i></b>                 |                                                                                                                                                                                                                                                               |                             |
| MW001                                                   | <i>S. acidocaldarius</i> DSM 639, $\Delta$ <i>pyrE</i>                                                                                                                                                                                                        | (Wagner et al., 2012)       |
| BM-A305                                                 | <i>S. acidocaldarius</i> MW001 with integrated deletion plasmid pSVA1312 incl. <i>pyrEF</i>                                                                                                                                                                   | <i>This study</i>           |
| BM-A306                                                 | <i>S. acidocaldarius</i> MW001 with integrated deletion plasmid pSVA1312 incl. <i>pyrEF</i>                                                                                                                                                                   | <i>This study</i>           |
| BM-A719                                                 | <i>S. acidocaldarius</i> MW001 with pSVA1337 (MAL <sub>promotor</sub> <i>saci1262</i> , C-terminal Strep- and His-Tag)                                                                                                                                        | <i>This study</i>           |
| BM-A720                                                 | <i>S. acidocaldarius</i> MW001 with pSVA1339 (MAL <sub>promotor</sub> <i>saci1262</i> , N-terminal Strep- and His-Tag)                                                                                                                                        | <i>This study</i>           |
| BM-A724                                                 | <i>S. acidocaldarius</i> MW001 with pBM-0078 (ARA <sub>promotor</sub> <i>saci1262</i> C-terminal Strep- and His-Tag)                                                                                                                                          | <i>This study</i>           |
| BM-A796                                                 | <i>S. acidocaldarius</i> MW001 with pSVA1266 (Mal <sub>promotor</sub> <i>saci0423-agl3</i> C-terminal Strep- and His-Tag)                                                                                                                                     | <i>This study</i>           |
| <b>Plasmids for generating deletion mutants</b>         |                                                                                                                                                                                                                                                               |                             |
| pSAV0407                                                | Gene targeting plasmid, pGEM-T Easy backbone, <i>pyrEF</i> cassette of <i>S. solfataricus</i>                                                                                                                                                                 | (Wagner et al., 2012)       |
| pSVA1266                                                | Expression vector of <i>agl3</i> ( <i>saci0423</i> ) cloned into pSVA1450 with <i>NcoI</i> and <i>EagI</i>                                                                                                                                                    | (Meyer et al., 2011)        |
| pSVA1312                                                | In-frame deletion of <i>agl24</i> ( <i>saci1262</i> ) cloned into pSVA407 with <i>Apal</i> and <i>BamHI</i>                                                                                                                                                   | <i>This study</i>           |
| pSVA3338                                                | Linear <i>saci1262</i> <sub>(short)</sub> - <i>pyrEF-saci1262</i> cut with <i>BamHI</i> and <i>Apal</i> into pSVA407                                                                                                                                          | <i>This study</i>           |
| <b>Expression plasmids for <i>S. acidocaldarius</i></b> |                                                                                                                                                                                                                                                               |                             |
| pSVA1481                                                | <i>E. coli</i> vector with Ara-promoter and C-terminal Strep- and His-tag based on pGEM-T Easy backbone and pMZ1 cassette, pMZ: Amp <sup>r</sup> , cloning vector containing replicon ColE1 (pBR322) and a 10X His-Strep tag sequence at the 3' end of the MC | Wagner & Albers             |
| pSVA1518                                                | Expression vector with ARA <sub>promotor</sub> and c-terminal Strep-His <sub>10</sub> tag                                                                                                                                                                     | Wagner & Albers             |
| pSVA1431                                                | Expression vector with MAL <sub>promotor</sub> and c-terminal Strep-His <sub>10</sub> tag                                                                                                                                                                     | Wagner & Albers             |
| pSVA2301                                                | Expression vector with MAL <sub>promotor</sub> and N-terminal His <sub>10</sub> - Strep- tag                                                                                                                                                                  | Wagner & Albers             |
| pSVA1336                                                | <i>agl24</i> cloned into pSVA1481 (ARA <sub>promotor</sub> )with a C-terminal Strep- and His-tag with <i>NcoI</i> and <i>PstI</i>                                                                                                                             | <i>This study</i>           |
| pSVA1337                                                | <i>agl24</i> with c-terminal Strep- and His-Tag derived from pSAV1336 subcloned into pSVA1431 (MAL <sub>promotor</sub> ) with <i>NcoI</i> and <i>EagI</i>                                                                                                     | <i>This study</i>           |
| pSVA1339                                                | <i>agl24</i> cloned into pSVA2301 with N-terminal His <sub>10</sub> Strep - TEV into pSVA2301 (MAL <sub>promotor</sub> ) with <i>NcoI</i> and <i>NotI</i> (Primer 4180 and 4181)                                                                              | <i>This study</i>           |
| pBM-0078                                                | Ara promotor <i>saci1262</i> with C-terminal Strep- and His-tag, cloned with <i>NcoI</i> <i>Apal</i>                                                                                                                                                          | <i>This study</i>           |
| <b>Expression plasmids for <i>E. coli</i></b>           |                                                                                                                                                                                                                                                               |                             |
| pWaldo                                                  | T7 expression vector containing TEV site-GFP-His <sub>8</sub>                                                                                                                                                                                                 | (Waldo et al., 1999)        |
| pHD0499                                                 | pWaldo containing <i>AgI24</i> -GFP-His <sub>8</sub> cloned with <i>XhoI</i> and <i>KpnI</i>                                                                                                                                                                  | <i>This study</i>           |
| pHD0554                                                 | pWaldo containing <i>AgI24</i> -H <sub>14</sub> A-GFP-His <sub>8</sub> cloned with <i>XhoI</i> and <i>KpnI</i>                                                                                                                                                | <i>This study</i>           |
| pHD0586                                                 | pWaldo containing <i>AgI24</i> -E <sub>114</sub> A-GFP-His <sub>8</sub> cloned with <i>XhoI</i> and <i>KpnI</i>                                                                                                                                               | <i>This study</i>           |

| Primer                                                                                             | Sequence (5'-3')                                                                                                                         | Restriction Site |
|----------------------------------------------------------------------------------------------------|------------------------------------------------------------------------------------------------------------------------------------------|------------------|
| <b><math>\Delta</math>AgI24</b>                                                                    |                                                                                                                                          |                  |
| 4168                                                                                               | ACTA <u>GGGCCC</u> GGTCTTGTGCTTAAATCACTCTGACATC                                                                                          | <i>Apal</i>      |
| 4163                                                                                               | GTC TAA AAA TGT GGC TCC TCC ACT GGC GAT AAT CAG TAA TGG GTT GTC                                                                          |                  |
| 4164                                                                                               | ATC GCC AGT GGA GGA GCC ACA TTT TTA GAC GAT CCC TCG ACC TGG GAC 4165                                                                     |                  |
| 4165                                                                                               | CGCCGA <u>GGATCC</u> CAC AAA TAT ATT CTC CCA AGA GTC TGG C                                                                               | <i>BamHI</i>     |
| <b>pSVA3338 Linear fragment <i>AgI24</i><sub>up</sub>-<i>pyrEF</i>-<i>AgI24</i><sub>down</sub></b> |                                                                                                                                          |                  |
| 4168                                                                                               | ACTA <u>GGGCCC</u> GGTCTTGTGCTTAAATCACTCTGACATC                                                                                          | <i>Apal</i>      |
| 6336                                                                                               | GTA ACA TAT CTT TGC TAA ATC GGT CAT TTT CGG GTA TTA C                                                                                    |                  |
| 4115                                                                                               | GTAATACCGAAAATGACCGATTTAGCAAAGATATGTTACTCGATTACGCTAGAAAA<br>TTTGAGCAGTTCTAGTACTTGGCTCAAAGAATG                                            |                  |
| 4116                                                                                               | GGT GTA CCT ATT TCG AAT TGG TTA GGT TTT CTA ACA TTT TGG ATA CTA TCT CAC TAA TTT CAT TTT TTC CTA AAA<br>ATT GCT CCT TTA CAT TTC           |                  |
| 6337                                                                                               | GTATCCAAAATGTTAGAAAACCTAACCAATTCGAAATAGGTACCC                                                                                            |                  |
| 6338                                                                                               | CGCCGA <u>GGATCC</u> GAA TGC CCA ATT TTT TCA TTT CTG CAA TAG TCT GTT C                                                                   | <i>BamHI</i>     |
| <b><i>S. acidocaldarius</i> Expression</b>                                                         |                                                                                                                                          |                  |
| pSVA1336                                                                                           |                                                                                                                                          |                  |
| 4176                                                                                               | CTGCA <u>CCATGGG</u> T ATCGACAACCCATTACTGATTATCGCCAGTGG                                                                                  | <i>NcoI</i>      |
| 4177                                                                                               | CCGTT <u>CTGCAG</u> C TCT AAG AAA TTC TGC TAA TTC ACT TAA AAT TAT ATC                                                                    | <i>PstII</i>     |
| pSVA1339                                                                                           |                                                                                                                                          |                  |
| 4180                                                                                               | CTGCA <u>CCATGGG</u> TCGACAACCCATTACTGATTATCGCCAGTGG                                                                                     | <i>NcoI</i>      |
| 4181                                                                                               | CCGTT <u>GCGGCCGC</u> TTA TCT AAG AAA TTC TGC TAA TTC ACT TAA AAT TAT ATC                                                                | <i>NotI</i>      |
| <b><i>E. coli</i> Expression of <i>agl24</i></b>                                                   |                                                                                                                                          |                  |
| A596                                                                                               | <i>saci1262</i> -fwd- <i>XhoI</i> AGGAGA <u>CTGCAG</u> ATGATCGACAACCCATTACTGATTATCGCC                                                    | <i>XhoI</i>      |
| A597                                                                                               | <i>saci1262</i> -rev- <i>KpnI</i> GATCCA <u>GGTACC</u> TCTCTAAGAAATCTGCTAATTCACCTAAAATTATATC                                             | <i>KpnI</i>      |
| A684                                                                                               | <i>saci1262</i> _H <sub>14</sub> A- <i>XhoI</i> -fwd<br>AGGAGACTCGAGATGATCGACAACCCATTACTGATTATCGCCAGTGGAGGAGGGGCTACTGGCTTCGCTAGAGCTATTGC | <i>XhoI</i>      |
| A685                                                                                               | <i>saci1262</i> _E <sub>114</sub> A-fwd GTGCACCTTATGTAACAGCTAGCCAAGACAGAATTATTAC                                                         |                  |
| A686                                                                                               | <i>saci1262</i> _E <sub>114</sub> A-rev GTAATAATCTGTCTTGGCTAGCTGTTACATAAAGTGCAC                                                          |                  |
