# Supplementary material for: Agl24 is an ancient archaeal homolog of the eukaryotic N-glycan chitobiose synthesis enzymes
Source: eLife journal article supplement (doi:10.7554/elife.67448), 2022-03-14
Supplement: supp4 [file elife-67448-supp4-v1.pdf]

| Component                                  | Domain                                                                                                          | Archaea                                                                |                      |                           | Bacteria           |
|--------------------------------------------|-----------------------------------------------------------------------------------------------------------------|------------------------------------------------------------------------|----------------------|---------------------------|--------------------|
|                                            | Eukarya                                                                                                         | Asgardarchaeota                                                        | Crenarchaeota        | Euryarchaeota             |                    |
| Lipid carrier                              | Dol                                                                                                             | Dol                                                                    | Dol                  | Dol                       | Und                |
| Linkage between N-glycan and lipid carrier | PP                                                                                                              | ?                                                                      | PP                   | P                         | PP                 |
| Nucleotide activated sugar donor           | yes                                                                                                             | ?                                                                      | yes                  | yes                       | yes                |
| Lipid activated sugar donor                | yes                                                                                                             | ?                                                                      | yes                  | yes                       | no                 |
| Oligosaccharyltransferase                  | Stt3/ STT3A/STT3B                                                                                               | AgIB (Stt3-like)                                                       | AgIB (Stt3-like)     | AgIB (PglB-like)          | PglB               |
| DK motif (DXXKXXX(M/I)                     | yes                                                                                                             | yes                                                                    | yes                  | yes                       |                    |
| DKi motif (D/E< >KXXXM/I/P)                |                                                                                                                 |                                                                        |                      | yes                       |                    |
| MI motif (MXXIXXX(I/V/W)                   |                                                                                                                 |                                                                        |                      | yes                       | yes                |
| double sequon DNXTZNXS/T                   | yes**                                                                                                           | yes                                                                    | yes                  |                           |                    |
| Non-catalytic OST subunits                 | Ost1/RPN1<br>Ost5/TMEM258<br>Swp1/RPN2<br>Wbp1/DDOST<br>Ost2/DAD1<br>Ost4 / Ost4<br>Ost6/TUSC3<br>or Ost3/MAGT1 | RPN1(ribo-phorin-1)*<br>Ost5*<br><br>Wbp1*<br><br>Ost6-like/Ost3-like* | n.d.                 | n.d.                      | n.d.               |
| First enzymes in the glycosylation         | Alg7<br>Agl14/13                                                                                                | ?                                                                      | AgIH<br>Agl24        | diverse                   | PglC<br>PglA       |
| N-glycan linking sugar(s)                  | Chitobiose<br>(GlcNAc-β 1,4- GlcNAc -β1-)                                                                       | ?                                                                      | Chitobiose***        | diverse                   | GalNAc-α1,3-Bac-β1 |
| N-glycan structure                         | tri-branched                                                                                                    | ?                                                                      | di- and tri-branched | linear, di-, tri-branched | linear             |
